# Supplementary material for: Mental Health and Health-Related Quality of Life in German Adolescents after the Third Wave of the COVID-19 Pandemic
Source: MDPI journal article supplement (doi:10.3390/children9060780), 2022-05-25
Supplement: s1 [file s1]

**Table S1.** Self-reported HRQoL and psychological symptoms in different sex groups.

|                                         | <b>Girls</b>  | <b>Boys</b>   | <b>Diverse</b> |
|-----------------------------------------|---------------|---------------|----------------|
|                                         | <i>n</i> =695 | <i>n</i> =674 | <i>n</i> =13   |
| HRQoL <sup>a</sup>                      |               |               |                |
| General HRQoL index, mean T values (SD) | 51.5 (10.70)  | 56.2 (11.22)  | 42.2 (7.85)    |
| SDQ <sup>b</sup> , mean scores (SD)     |               |               |                |
| Emotional problems                      | 3.8 (2.63)    | 2.2 (1.96)    | 6.2 (2.56)     |
| Conduct problems                        | 1.8 (1.56)    | 1.6 (1.50)    | 2.5 (1.57)     |
| Hyperactivity                           | 3.4 (2.22)    | 3.4 (2.21)    | 4.0 (2.45)     |
| Peer problems                           | 2.5 (1.85)    | 2.2 (1.80)    | 2.7 (1.56)     |
| Prosocial behavior                      | 8.4 (1.79)    | 8.1 (1.78)    | 7.0 (2.17)     |
| Externalizing score                     | 5.2 (3.25)    | 5.0 (3.13)    | 6.5 (3.03)     |
| Internalizing score                     | 6.3 (3.73)    | 4.4 (3.15)    | 8.9 (3.42)     |
| Total Score                             | 11.5 (5.80)   | 9.4 (5.20)    | 14.8 (6.21)    |

<sup>a</sup> 10-item General HRQoL index assessed by the KIDSCREEN-10; <sup>b</sup> Strengths and Difficulties Questionnaire.
